# Supplementary material for: Pushing the frontiers: boron-11 NMR as a method for quantitative boron analysis and its application to determine boric acid in commercial biocides
Source: Royal Society of Chemistry journal article supplement (doi:10.1039/c8an00505b), 2018-01-01
Supplement: c8an00505b1.pdf [file c8an00505b1.pdf]

## Supporting Information

### Pushing the frontiers: Boron-11 NMR as a Method for Quantitative Boron Analysis and its Application to Determine Boric Acid in Commercial Biocides

Luis Manuel Aguilera-Sáez, José Raúl Belmonte-Sánchez, Roberto Romero-González, José Luis Martínez Vidal, Francisco Javier Arrebola, Antonia Garrido Frenich and Ignacio Fernández\*

*Department of Chemistry and Physics, Research Centre CIAIMBITAL, Agrifood Campus of International Excellence, ceiA3, University of Almería, Ctra. Sacramento, s/n, 04120, Almería (Spain).*

#### Table of Contents

|                                                                                                                                                                                                                                                                                                                             |   |
|-----------------------------------------------------------------------------------------------------------------------------------------------------------------------------------------------------------------------------------------------------------------------------------------------------------------------------|---|
| <b>Figure S1.</b> $^{11}\text{B}$ qNMR spectra (96.294 MHz) measured in $\text{D}_2\text{O}$ of a commercial biocide using a) quartz and b) standard 5 mm NMR tubes.....                                                                                                                                                    | 2 |
| <b>Figure S2.</b> $^{11}\text{B}$ T1 inversion-recovery experiment (294 K, 96.294 MHz) of boric acid in $\text{D}_2\text{O}$ at a concentration of 1.0 % (w/w). .....                                                                                                                                                       | 2 |
| <b>Figure S3.</b> a) $^{11}\text{B}$ NMR spectra (96.294 MHz) of borax solutions in $\text{D}_2\text{O}$ at 294 K at pH 13. Experimental time of each spectrum of 50 seconds; b) Calibration curve stack plot of borax solutions in pure $\text{D}_2\text{O}$ at pH 13. Values coming from three replicates are shown. .... | 3 |

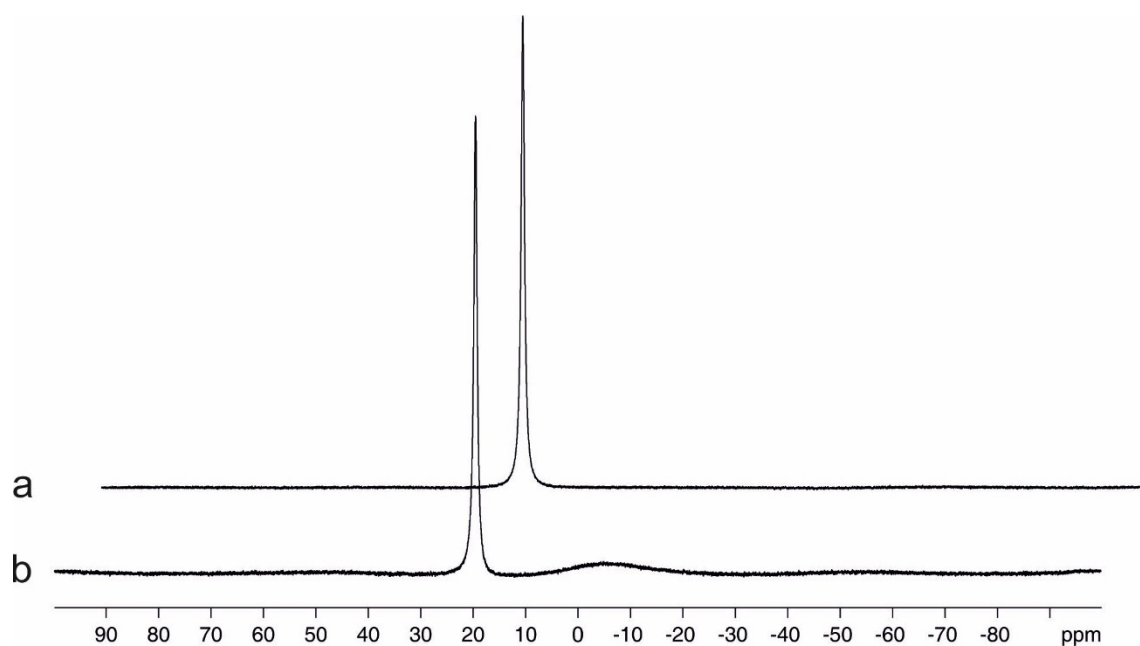

**Figure S1.**  $^{11}\text{B}$  qNMR spectra (96.294 MHz) measured in  $\text{D}_2\text{O}$  of a commercial biocide using a) quartz and b) standard 5 mm NMR tubes.

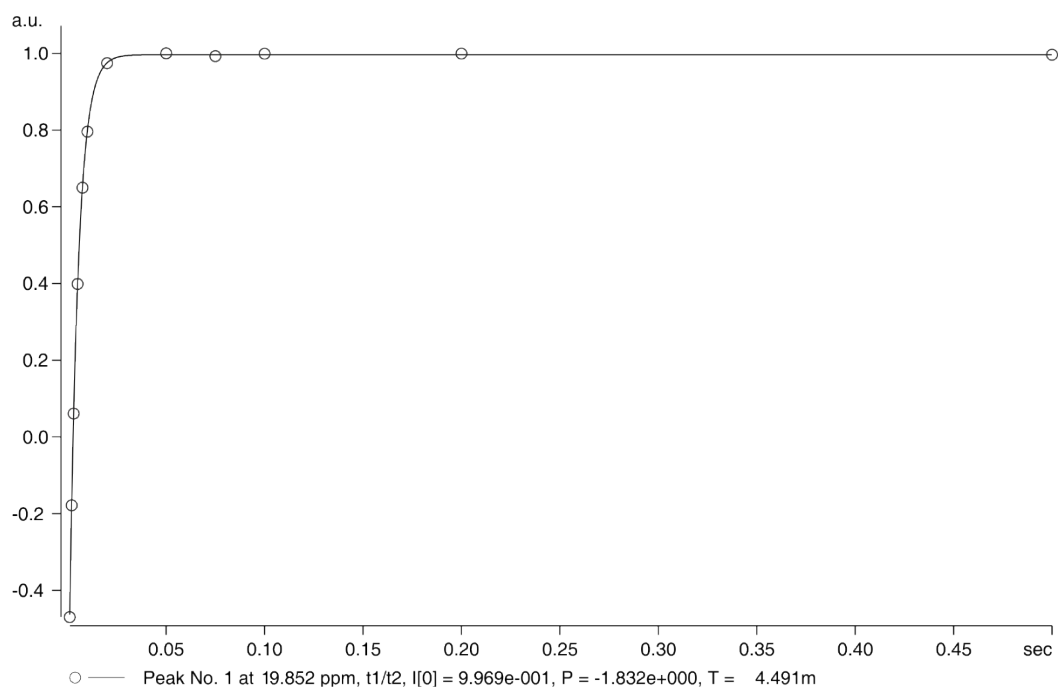

**Figure S2.**  $^{11}\text{B}$  T<sub>1</sub> inversion-recovery experiment (294 K, 96.294 MHz) of boric acid in  $\text{D}_2\text{O}$  at a concentration of 1.0 % (w/w).

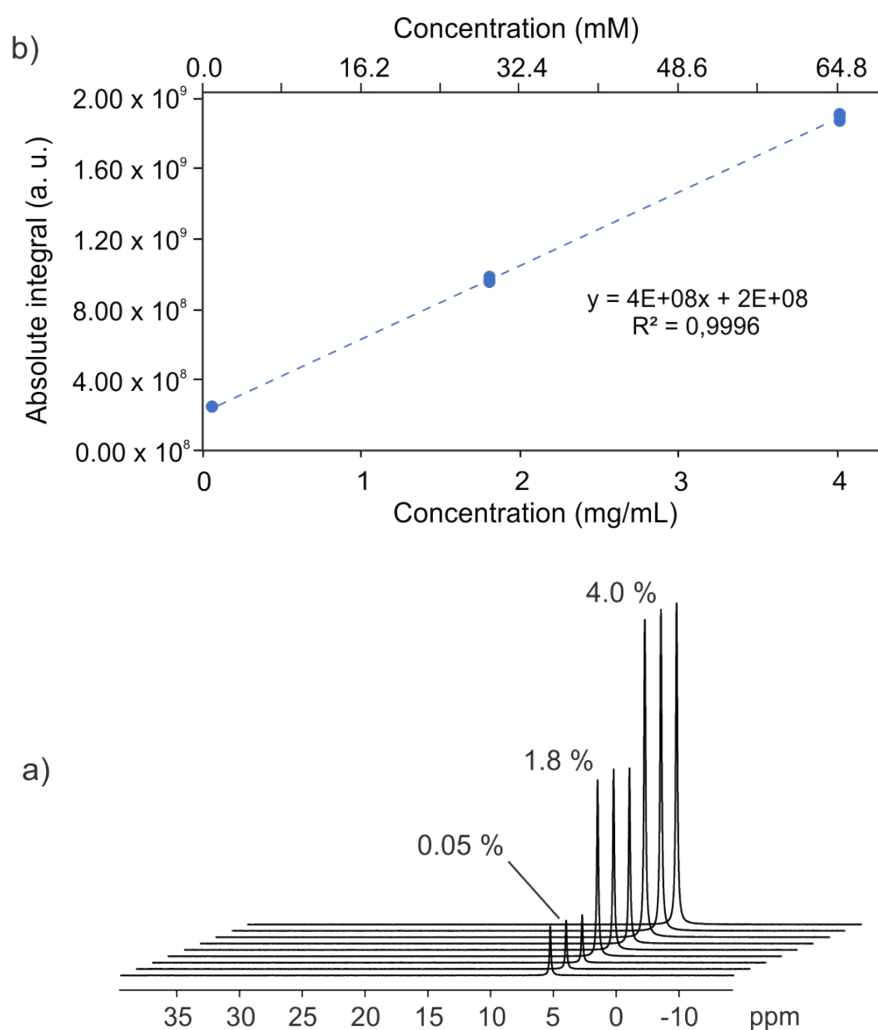

**Figure S3.** a)  $^{11}\text{B}$  NMR spectra (96.294 MHz) of borax solutions in  $\text{D}_2\text{O}$  at 294 K at pH 13. Experimental time of each spectrum of 50 seconds; b) Calibration curve stack plot of borax solutions in pure  $\text{D}_2\text{O}$  at pH 13. Values coming from three replicates are shown.
